# Supplementary material for: Enhanced β-adrenergic signalling underlies an age-dependent beneficial metabolic effect of PI3K p110α inactivation in adipose tissue
Source: PubMed Central journal article supplement (PMC6449391; doi:10.1038/s41467-019-09514-1), 2019-04-04
Supplement: 41467_2019_9514_MOESM3_ESM.pdf [file 41467_2019_9514_MOESM3_ESM.pdf]

## Description of Supplementary Files

**File Name:** Supplementary Data 1.

**Description:** Uncropped images of the most important blots presented in the article.
